# Supplementary material
Source: HighWire-hosted journal article supplement (https://sit.bmj.com/highwire/filestream/170/field_highwire_adjunct_files/0/bmjsit-2020-000054supp001_data_supplement.pdf)
Supplement: bmjsit-2020-000054supp001_data_supplement.pdf [file bmjsit-2020-000054supp001_data_supplement.pdf]

| Supplement Table 1: Endoleak Definitions |                                                                                                                                                 |
|------------------------------------------|-------------------------------------------------------------------------------------------------------------------------------------------------|
| Type 1 Endoleak                          | Persistent filling of aneurysm due to inadequate seal between graft and vessel wall at the proximal (1a) or distal (1b) end of the stent graft. |
| Type 2 Endoleak                          | Filling of aneurysm sac due to retrograde flow from collateral aortic branch vessels                                                            |
| Type 3 Endoleak                          | Persistent filling of aneurysm through graft components via either module disconnections (3a) or fabric disruption (3b).                        |
| Type 4 Endoleak                          | Filling of aneurysm sac due to porosity of graft material.                                                                                      |
| Type 5 Endoleak                          | Endotension - expansion of aneurysm sac without clear endoleak source.                                                                          |
| Indeterminate                            | Unable to determine type of endoleak                                                                                                            |
